# Supplementary material for: Pgam5 released from damaged mitochondria induces mitochondrial biogenesis via Wnt signaling
Source: PubMed Central journal article supplement — J Cell Biol. 2018 Apr 2;217(4):1383–94. doi: 10.1083/jcb.201708191 (PMC5881504; doi:10.1083/jcb.201708191), 2018-04-02
Supplement: JCB_201708191_sm.pdf [file JCB_201708191_sm.pdf]

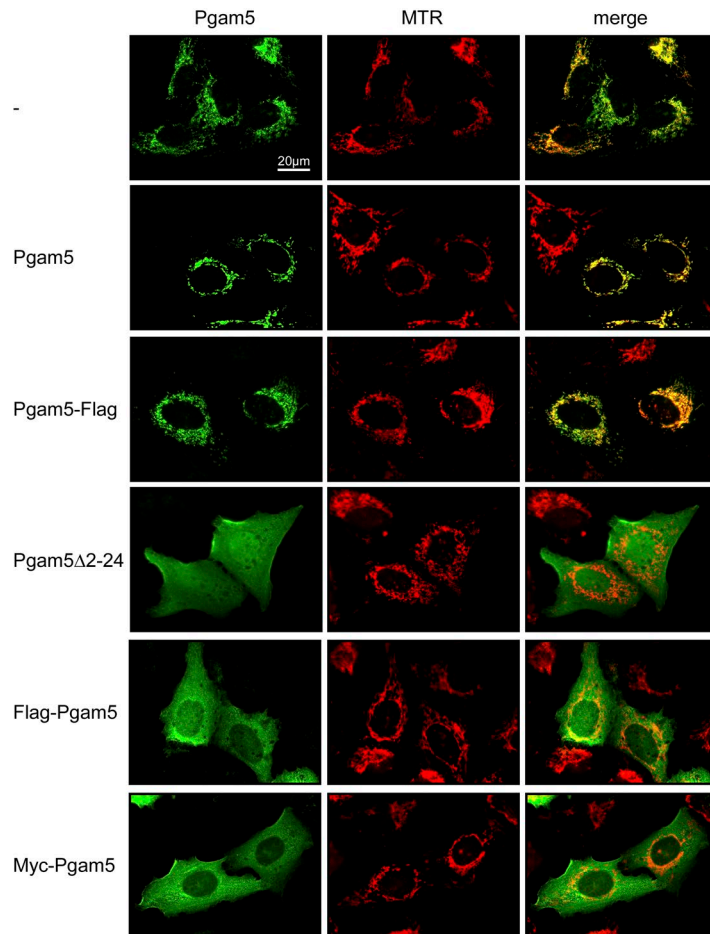

Figure S1. **Immunofluorescence staining of Pgam5 (green) and costaining of mitochondria with MTR (red) in U2OS cells.** Cells were left untransfected (top row) or transfected with constructs indicated on the left.

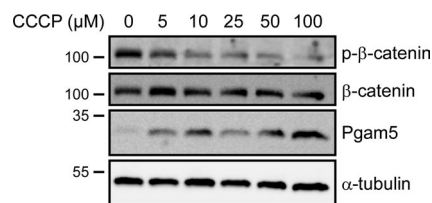

Figure S2. **Western blotting for indicated proteins in hypotonic lysates of U2OS cells treated with increasing CCCP concentrations for 4 h.** Molecular masses are given in kilodaltons. P-β-catenin, phospho-β-catenin.

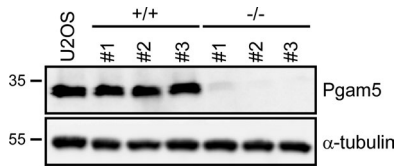

Figure S3. **Western blotting for Pgam5 and  $\alpha$ -tubulin in lysates of parental U2OS cells, three CRISPR/Cas9 control clones, and three Pgam5 knockout clones.**  $\alpha$ -Tubulin was used as a loading control. Molecular masses are given in kilodaltons. +/+, CRISPR/Cas9 control clones; -/-, Pgam5 knockout clones.

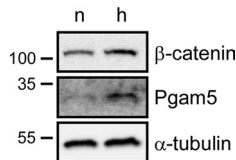

Figure S4. **Western blotting for  $\beta$ -catenin, Pgam5, and  $\alpha$ -tubulin in hypotonic lysates of U2OS cells, which were incubated under normoxic or hypoxic conditions for 24 h before lysis.**  $\alpha$ -Tubulin was used as a loading control. Molecular masses are given in kilodaltons. h, hypoxic; n, normoxic.

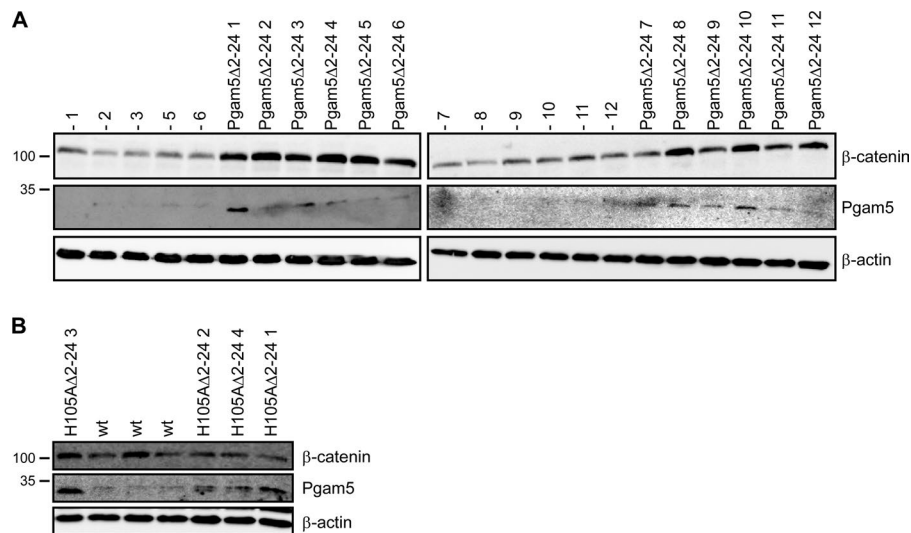

Figure S5. **Increase of  $\beta$ -catenin levels in C2C12 clones stably expressing Pgam5 $\Delta$ 2-24 and expression of Pgam5 $\Delta$ 2-24 and H105A $\Delta$ 2-24 in C2C12 clones. (A and B) Western blotting for  $\beta$ -catenin, Pgam5, and  $\beta$ -actin (loading control) in hypotonic lysates of C2C12 WT clones and clones stably expressing Pgam5 $\Delta$ 2-24 (A) or H105A $\Delta$ 2-24 (B). Because the signal for Pgam5 in hypotonic extracts was rather low, classification is based on four independent extracts of every clone. Molecular masses are given in kilodaltons.**
